# Supplementary material
Source: PubMed Central journal article supplement (PMC10199956)
Supplement: NIHMS1852841-supplement-1.pdf [file NIHMS1852841-supplement-1.pdf]

## Circadian disruption and colorectal cancer incidence in Black women

Lauren E. Barber, Trang VoPham, Laura F. White, Hemant K. Roy, Julie R. Palmer, Kimberly A. Bertrand

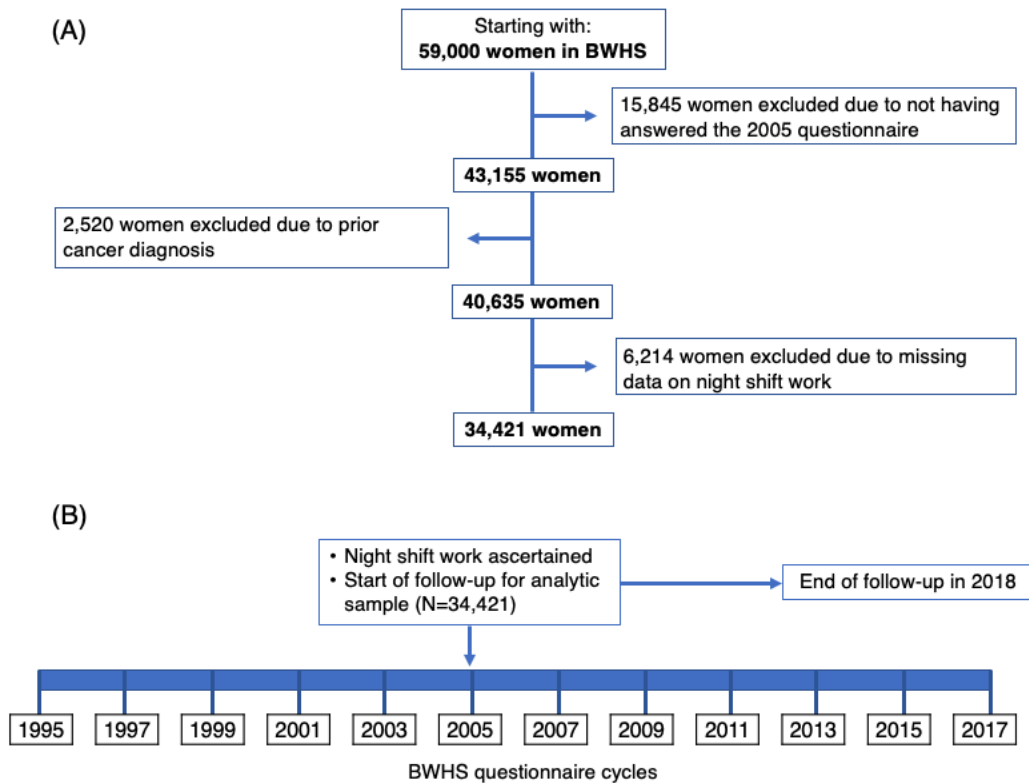

### Supplemental Figure S1. Flow diagram and timeline of BWHS participants included in the night shift work analytic sample.

Supplemental Figure S1a shows exclusion criteria for the night shift work and colorectal cancer analysis and the number of BWHS participants ultimately included in the analytic sample.

Supplemental Figure S1b shows a timeline of the BWHS biennial questionnaire cycles, the year in which night shift work was ascertained, and the start and end of follow-up.
