# Supplementary material
Source: PubMed Central journal article supplement (PMC10199956)
Supplement: NIHMS1852841-supplement-2.pdf [file NIHMS1852841-supplement-2.pdf]

## Circadian disruption and colorectal cancer incidence in Black women

Lauren E. Barber, Trang VoPham, Laura F. White, Hemant K. Roy, Julie R. Palmer, Kimberly A. Bertrand

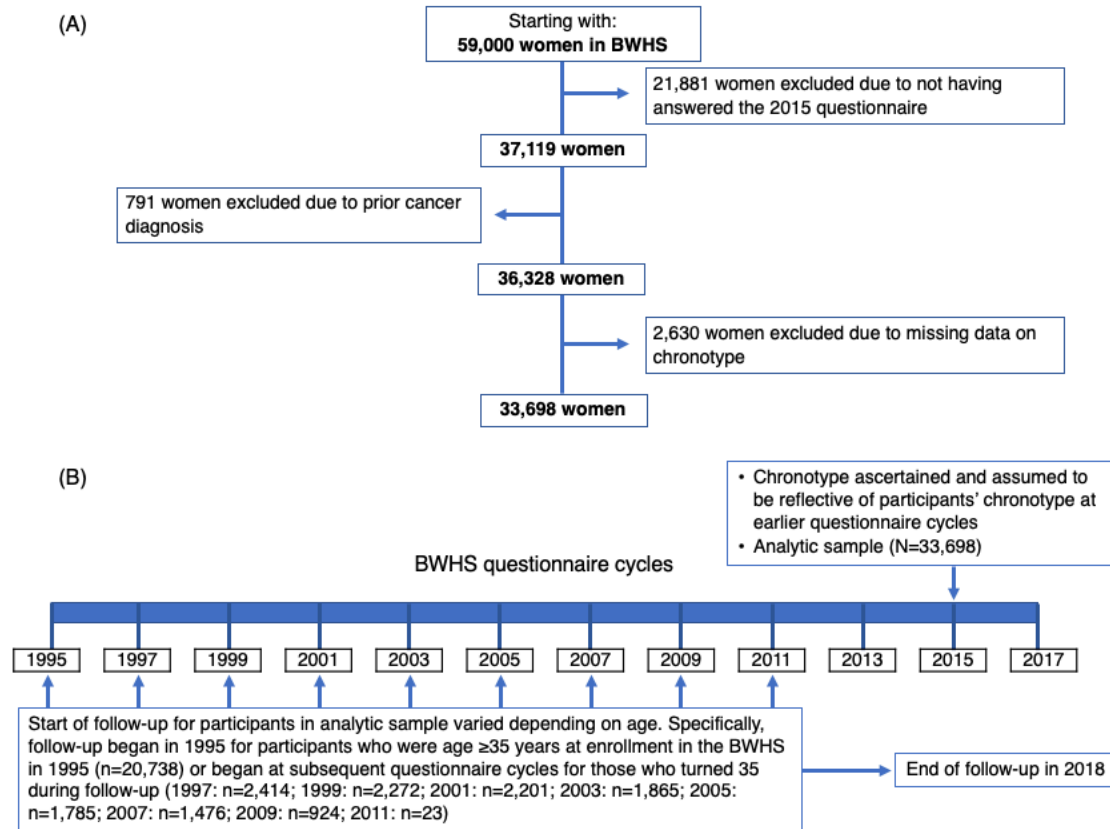

### Supplemental Figure S2. Flow diagram and timeline of BWHS participants included in the chronotype analytic sample.

Supplemental Figure S2a shows exclusion criteria for the chronotype and colorectal cancer analysis and the number of BWHS participants ultimately included in the analytic sample. Supplemental Figure S2b shows a timeline of the BWHS biennial questionnaire cycles, the year in which chronotype was ascertained, and the start and end of follow-up.
