# Supplementary material
Source: PubMed Central journal article supplement (PMC10199956)
Supplement: NIHMS1852841-supplement-3.pdf [file NIHMS1852841-supplement-3.pdf]

## Circadian disruption and colorectal cancer incidence in Black women

Lauren E. Barber, Trang VoPham, Laura F. White, Hemant K. Roy, Julie R. Palmer, Kimberly A. Bertrand

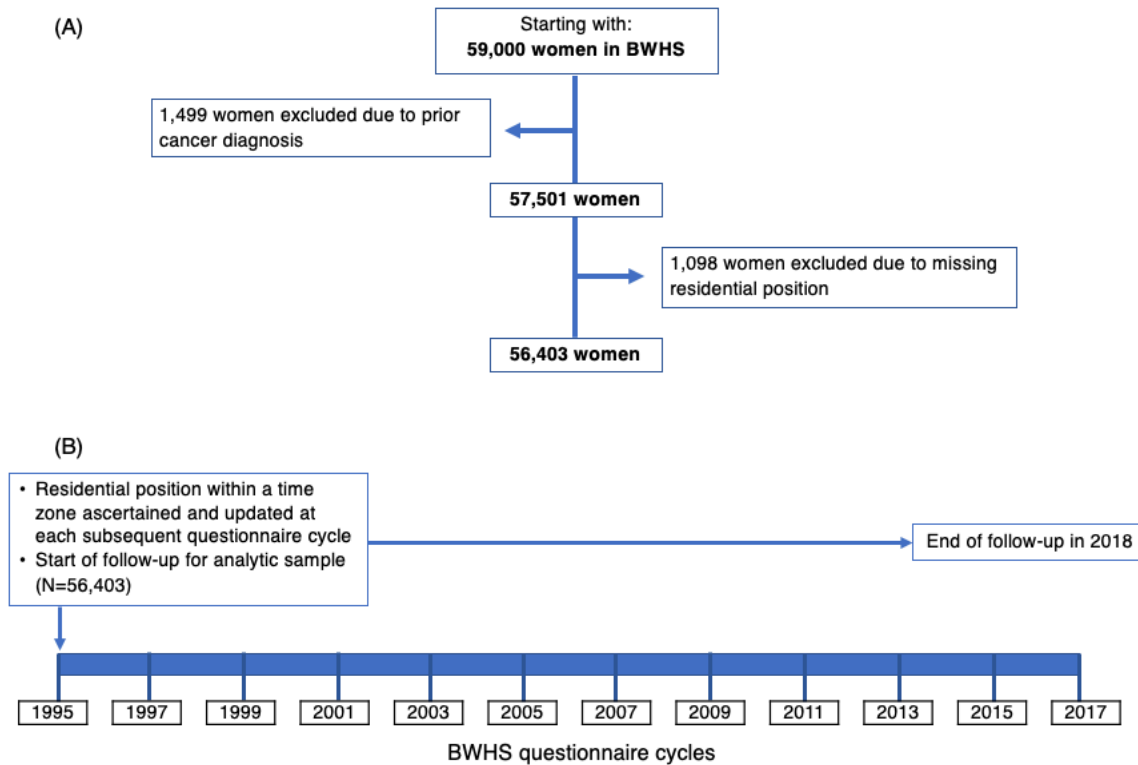

### Supplemental Figure S3. Flow diagram and timeline of BWHS participants included in the residential position within a time zone analytic sample.

Supplemental Figure 3a shows exclusion criteria for the residential position within a time zone and colorectal cancer analysis and the number of BWHS participants ultimately included in the analytic sample. Supplemental Figure 2b shows a timeline of the BWHS biennial questionnaire cycles, the years in which residential position was ascertained, and the start and end of follow-up.
