# Supplementary material
Source: PubMed Central journal article supplement (PMC10199956)
Supplement: NIHMS1852841-supplement-4.pdf [file NIHMS1852841-supplement-4.pdf]

## Circadian disruption and colorectal cancer incidence in Black women

Lauren E. Barber, Trang VoPham, Laura F. White, Hemant K. Roy, Julie R. Palmer,  
Kimberly A. Bertrand

**Supplemental Table S1. Age-standardized characteristics of the residential position within a time zone analytic sample at study entry according to quartiles of residential position.**

|                                                          | Residential position within a time zone |                          |                          |                          |
|----------------------------------------------------------|-----------------------------------------|--------------------------|--------------------------|--------------------------|
|                                                          | Quartile 1<br>(n=13,960)                | Quartile 2<br>(n=13,877) | Quartile 3<br>(n=14,182) | Quartile 4<br>(n=14,384) |
| Distance from residential position to time zone meridian | -2.27 (0.6)                             | -0.84 (0.4)              | 1.94 (0.8)               | 8.16 (1.7)               |
| Time zone                                                |                                         |                          |                          |                          |
| Eastern time zone, %                                     | 16                                      | 86                       | 60                       | 88                       |
| Central time zone, %                                     | 45                                      | 8                        | 14                       | 9                        |
| Mountain time zone, %                                    | 0                                       | 4                        | 0                        | 3                        |
| Pacific time zone, %                                     | 40                                      | 2                        | 25                       | 0                        |
| Age                                                      | 39.34 (10.8)                            | 38.52 (11.0)             | 38.0 (10.8)              | 39.26 (10.6)             |
| Body Mass Index, kg/m <sup>2</sup>                       | 27.94 (6.8)                             | 28.0 (6.7)               | 28.17 (6.7)              | 28.07 (6.7)              |
| Years of education: ≤12 years, %                         | 17                                      | 21                       | 19                       | 19                       |
| Family history of colorectal cancer, %                   | 9                                       | 9                        | 10                       | 9                        |
| Smoking status: Current, %                               | 15                                      | 18                       | 15                       | 14                       |
| Alcohol consumption: Current, ≥7 drinks/week, %          | 7                                       | 7                        | 7                        | 6                        |
| Vigorous exercise: ≥5 hours/week, %                      | 13                                      | 13                       | 13                       | 12                       |
| Red meat consumption: Highest quartile, %                | 23                                      | 18                       | 22                       | 27                       |
| Processed meat consumption: Highest quartile, %          | 21                                      | 19                       | 23                       | 26                       |
| Total fiber intake: Highest quartile, %                  | 23                                      | 24                       | 22                       | 22                       |
| Geographic region                                        |                                         |                          |                          |                          |
| Northeast region, %                                      | 16                                      | 86                       | 9                        | 0                        |
| Southern region, %                                       | 1                                       | 4                        | 60                       | 56                       |
| Midwestern region, %                                     | 44                                      | 4                        | 5                        | 41                       |
| Western region, %                                        | 40                                      | 6                        | 25                       | 3                        |
| Sleep duration (ascertained in 2009): ≤6 hours, %        | 44                                      | 45                       | 44                       | 45                       |

Values are means(SD) or percentages and are standardized to the age distribution of the study population.
