# Supplementary material
Source: PubMed Central journal article supplement (PMC10199956)
Supplement: NIHMS1852841-supplement-5.pdf [file NIHMS1852841-supplement-5.pdf]

## Circadian disruption and colorectal cancer incidence in Black women

Lauren E. Barber, Trang VoPham, Laura F. White, Hemant K. Roy, Julie R. Palmer,  
Kimberly A. Bertrand

**Supplemental Table S2. Age-standardized characteristics of the night shift work analytic sample at the start of study follow-up in 2005 according to categories of night shift work.**

|                                                   | Never<br>(n=19,674) | Ever<br>(n=14,747) |
|---------------------------------------------------|---------------------|--------------------|
| Age                                               | 48.6 (10.6)         | 49.1 (10.3)        |
| Body mass index, kg/m <sup>2</sup>                | 29.6 (6.8)          | 31.0 (7.3)         |
| Years of education: ≤12 years %                   | 12                  | 16                 |
| Family history of colorectal cancer, %            | 10                  | 11                 |
| Smoking status: Current, %                        | 9                   | 13                 |
| Alcohol consumption: Current, ≥7 drinks/week, %   | 4                   | 4                  |
| Vigorous exercise: ≥5 hours/week, %               | 7                   | 6                  |
| Red meat consumption: Highest quartile, %         | 23                  | 25                 |
| Processed meat consumption: Highest quartile, %   | 23                  | 25                 |
| Total fiber intake: Highest quartile, %           | 20                  | 18                 |
| Geographic region                                 |                     |                    |
| Northeast, %                                      | 25                  | 22                 |
| South, %                                          | 35                  | 35                 |
| Midwest, %                                        | 21                  | 23                 |
| West, %                                           | 17                  | 18                 |
| Sleep duration (ascertained in 2009): ≤6 hours, % | 40                  | 45                 |

Values are means (SD) or percentages and are standardized to the age distribution of the study population.
