# Supplementary material
Source: PubMed Central journal article supplement (PMC10199956)
Supplement: NIHMS1852841-supplement-6.pdf [file NIHMS1852841-supplement-6.pdf]

## Circadian disruption and colorectal cancer incidence in Black women

Lauren E. Barber, Trang VoPham, Laura F. White, Hemant K. Roy, Julie R. Palmer,  
Kimberly A. Bertrand

**Supplemental Table S3. Age-standardized characteristics of the chronotype analytic sample at the start of study follow-up in 1995 or upon turning age 35 according to categories of chronotype.**

|                                                                 | Morning<br>(n=18,824) | Evening<br>(n=10,544) | Neither or<br>unsure<br>(n=4,330) |
|-----------------------------------------------------------------|-----------------------|-----------------------|-----------------------------------|
| Age                                                             | 41.3 (7.2)            | 40.3 (6.7)            | 41.9 (7.8)                        |
| Body mass index, kg/m <sup>2</sup>                              | 28.4 (6.5)            | 29.0 (7.0)            | 28.8 (6.9)                        |
| Years of education: ≤12 years %                                 | 16                    | 13                    | 17                                |
| Family history of colorectal cancer, %                          | 12                    | 12                    | 11                                |
| Smoking status: Current, %                                      | 13                    | 15                    | 13                                |
| Alcohol consumption: Current, ≥7 drinks/week, %                 | 5                     | 6                     | 6                                 |
| Vigorous exercise: ≥5 hours/week, %                             | 11                    | 9                     | 11                                |
| Red meat consumption: Highest quartile, %                       | 20                    | 23                    | 22                                |
| Processed meat consumption: Highest quartile, %                 | 22                    | 21                    | 22                                |
| Total fiber intake: Highest quartile, %                         | 24                    | 20                    | 21                                |
| Geographic region                                               |                       |                       |                                   |
| Northeast, %                                                    | 26                    | 25                    | 28                                |
| South, %                                                        | 32                    | 33                    | 31                                |
| Midwest, %                                                      | 23                    | 22                    | 22                                |
| West, %                                                         | 18                    | 19                    | 18                                |
| Duration of night shift work (ascertained in 2005): ≥10 year, % | 3                     | 5                     | 5                                 |
| Sleep duration (ascertained in 2009): ≤6 hours, %               | 42                    | 47                    | 44                                |

Values are means (SD) or percentages and are standardized to the age distribution of the study population.
