# Supplementary material
Source: PubMed Central journal article supplement (PMC10199956)
Supplement: NIHMS1852841-supplement-7.pdf [file NIHMS1852841-supplement-7.pdf]

## Circadian disruption and colorectal cancer incidence in Black women

Lauren E. Barber, Trang VoPham, Laura F. White, Hemant K. Roy, Julie R. Palmer,  
Kimberly A. Bertrand

**Supplemental Table S4. Age-adjusted hazard ratios for the association between chronotype and risk of colorectal cancer, according to strata of age, geographic region, BMI, and night shift work.**

| Stratifying variables         | Morning chronotype |              |                                       | Evening chronotype |              |                                       | Neither a morning nor evening chronotype |              |                                       |
|-------------------------------|--------------------|--------------|---------------------------------------|--------------------|--------------|---------------------------------------|------------------------------------------|--------------|---------------------------------------|
|                               | Cases              | Person-Years | Age-adjusted HR (95% CI) <sup>a</sup> | Cases              | Person-Years | Age-adjusted HR (95% CI) <sup>a</sup> | Cases                                    | Person-Years | Age-adjusted HR (95% CI) <sup>a</sup> |
| Age                           |                    |              |                                       |                    |              |                                       |                                          |              |                                       |
| <50 years                     | 38                 | 173,659      | 1.00 (ref)                            | 23                 | 103,534      | 1.00 (0.59–1.67)                      | 8                                        | 37,990       | 0.94 (0.44–2.02)                      |
| ≥50 years                     | 118                | 179,229      | 1.00 (ref)                            | 55                 | 87,379       | 0.97 (0.71–1.34)                      | 22                                       | 42,994       | 0.73 (0.46–1.15)                      |
| Geographic region             |                    |              |                                       |                    |              |                                       |                                          |              |                                       |
| Northeast                     | 35                 | 81,759       | 1.00 (ref)                            | 17                 | 42,364       | 1.04 (0.58–1.87)                      | <sup>c</sup>                             | –            | –                                     |
| South                         | 52                 | 121,542      | 1.00 (ref)                            | 25                 | 68,842       | 0.89 (0.55–1.44)                      | 12                                       | 26,705       | 1.03 (0.55–1.94)                      |
| Midwest                       | 37                 | 80,094       | 1.00 (ref)                            | 17                 | 40,487       | 0.97 (0.55–1.73)                      | 6                                        | 17,503       | 0.72 (0.30–1.71)                      |
| West                          | 27                 | 61,995       | 1.00 (ref)                            | 17                 | 35,130       | 1.22 (0.66–2.24)                      | 7                                        | 14,728       | 0.95 (0.41–2.20)                      |
| BMI                           |                    |              |                                       |                    |              |                                       |                                          |              |                                       |
| <30                           | 90                 | 206,462      | 1.00 (ref)                            | 38                 | 103,845      | 0.91 (0.62–1.33)                      | 14                                       | 45,133       | 0.67 (0.38–1.18)                      |
| ≥30                           | 66                 | 143,382      | 1.00 (ref)                            | 40                 | 85,847       | 1.07 (0.72–1.60)                      | 16                                       | 35,119       | 0.90 (0.52–1.56)                      |
| Night shift work <sup>b</sup> |                    |              |                                       |                    |              |                                       |                                          |              |                                       |
| Never                         | 47                 | 100,198      | 1.00 (ref)                            | 22                 | 52,878       | 0.96 (0.58–1.60)                      | 7                                        | 22,067       | 0.66 (0.30–1.48)                      |
| Ever                          | 30                 | 68,709       | 1.00 (ref)                            | 24                 | 40,834       | 1.41 (0.82–2.42)                      | 6                                        | 15,880       | 0.84 (0.35–2.03)                      |

BMI, Body mass index; HR, Hazard ratio; CI, Confidence interval.

<sup>a</sup> Hazard ratios adjusted for age (continuous) and time period (continuous).

<sup>b</sup> Follow-up for night shift work-stratified analysis began in 2005, when data on night shift work was ascertained.

<sup>c</sup> Hazard ratios are not presented for case counts <5.
