# Supplementary material
Source: PubMed Central journal article supplement (PMC10199956)
Supplement: NIHMS1852841-supplement-8.pdf [file NIHMS1852841-supplement-8.pdf]

## Circadian disruption and colorectal cancer incidence in Black women

Lauren E. Barber, Trang VoPham, Laura F. White, Hemant K. Roy, Julie R. Palmer,  
Kimberly A. Bertrand

**Supplemental Table S5. Hazard ratios for the association between residential position within a time zone and risk of colorectal cancer, according to strata of age, geographic region, latitude, and chronotype.**

| Stratifying variables       | Per 5-degree longitude increment in residential position from eastern to western border of time zone |              |                                       |
|-----------------------------|------------------------------------------------------------------------------------------------------|--------------|---------------------------------------|
|                             | Cases                                                                                                | Person-Years | Age-adjusted HR (95% CI) <sup>a</sup> |
| Age                         |                                                                                                      |              |                                       |
| <50 years                   | 105                                                                                                  | 517,187      | 0.95 (0.76–1.20)                      |
| ≥50 years                   | 347                                                                                                  | 380,563      | 0.92 (0.81–1.04)                      |
| Geographic region           |                                                                                                      |              |                                       |
| Northeast                   | 93                                                                                                   | 224,627      | 0.76 (0.36–1.59)                      |
| South                       | 148                                                                                                  | 309,982      | 0.77 (0.60–0.98)                      |
| Midwest                     | 121                                                                                                  | 203,755      | 0.91 (0.77–1.08)                      |
| West                        | 90                                                                                                   | 159,313      | 0.81 (0.54–1.21)                      |
| Latitude                    |                                                                                                      |              |                                       |
| >39 degrees (North)         | 232                                                                                                  | 459,414      | 0.97 (0.84–1.14)                      |
| ≤39 degrees (South)         | 220                                                                                                  | 438,337      | 0.85 (0.72–1.01)                      |
| Chronotype                  |                                                                                                      |              |                                       |
| Morning                     | 138                                                                                                  | 355,333      | 0.94 (0.77–1.15)                      |
| Evening                     | 73                                                                                                   | 200,099      | 0.92 (0.69–1.21)                      |
| Neither morning nor evening | 23                                                                                                   | 81,503       | 1.58 (1.01–2.47)                      |

HR, Hazard ratio; CI, Confidence interval.

<sup>a</sup> Hazard ratios adjusted for age (continuous) and time period (continuous).
